# Supplementary material for: Emotions and interactive tangible tools for math achievement in primary schools
Source: Frontiers journal article supplement (doi:10.3389/fpsyg.2024.1440981), 2024-10-29
Supplement: Data_Sheet_1.pdf [file Data_Sheet_1.pdf]

## Supplementary Materials

**Figure S1**

Photographs of the SMARTER device

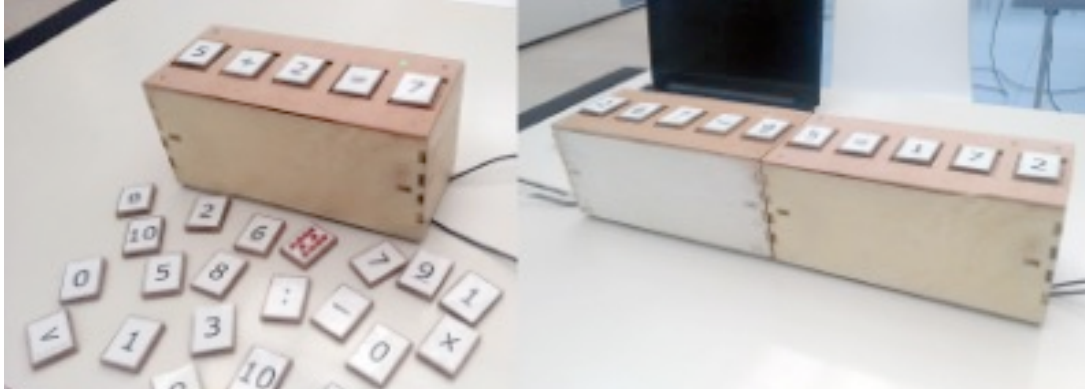

*Note.* On the left, a single device with plywood tiles representing numbers and mathematical operations; on the right, two SMARTER devices connected to realize a large working surface (from Andrao et al. 2022).

**Figure S2**

Schematic representation of the SMARTER components

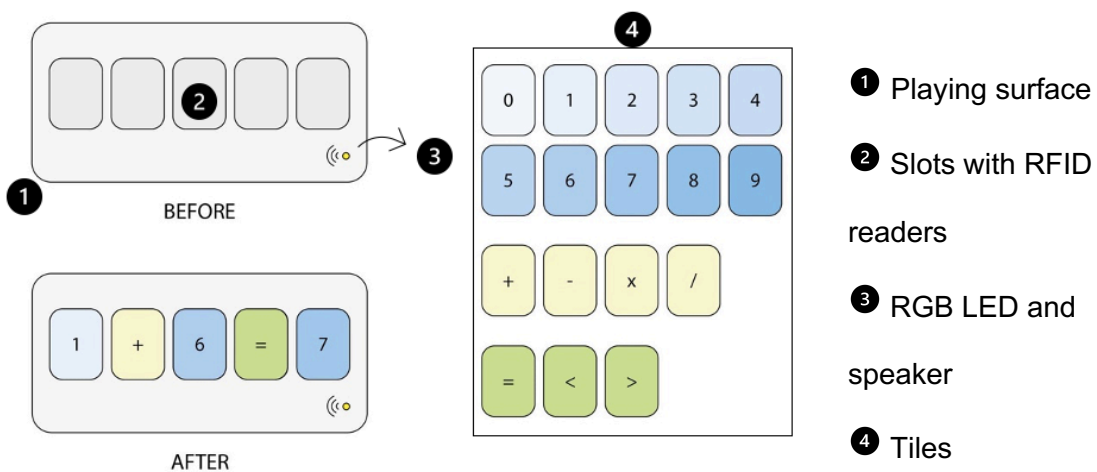

**Figure S3**  
 Photographs depicting the experimental setting

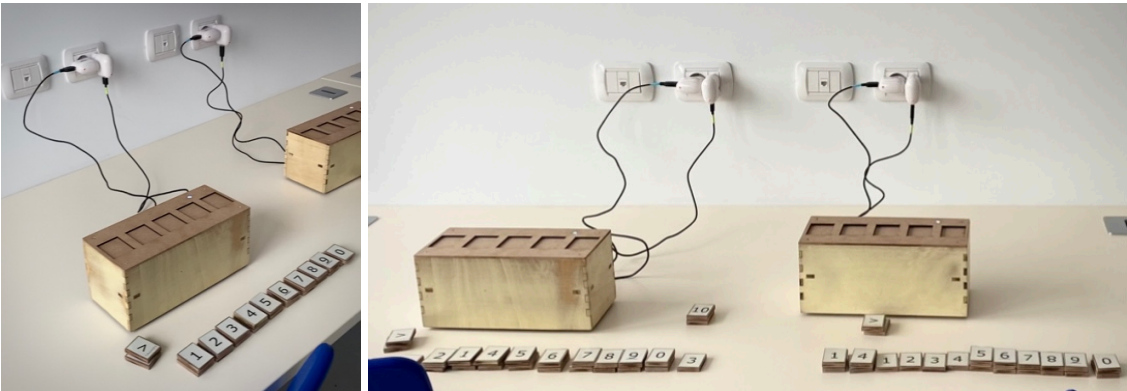

**Table S1**  
 Film clips shown for the elicitation of positive and neutral emotions during the testing phase

| Valence  | Video                             | Year | Extract                                      | Start | End   |
|----------|-----------------------------------|------|----------------------------------------------|-------|-------|
| Positive | <i>The Jungle Book</i>            | 1967 | Song “The bare Necessities”                  | 25:21 | 28:21 |
|          | (Von Leupoldt et al., 2007)       |      |                                              |       |       |
|          | <i>101 Dalmatians</i>             | 1961 | Birth of the puppies                         | 15:20 | 18:20 |
|          | (Essex et al., 2003)              |      |                                              |       |       |
| Neutral  | <i>The Last Unicorn</i>           | 1982 | Theme Song: unicorn and nature               | 0:00  | 3:00  |
|          | (de Freitas Brandão et al., 2016) |      |                                              |       |       |
|          | <i>The Snowman</i>                | 1982 | Theme song: children, winter and the snowman | 0:00  | 3:00  |
|          | (Talge et al., 2008)              |      |                                              |       |       |

*Note.* An additional film was shown to all children at the end of the experimental session in order to conclude the experiment with a positive emotional state. The film was Robin Hood (1971; start 50:55, end 53:55).
